# Supplementary material for: Enhanced CT-based radiomics predicts pathological complete response after neoadjuvant chemotherapy for advanced adenocarcinoma of the esophagogastric junction: a two-center study
Source: Springer Nature journal article supplement (doi:10.1186/s13244-022-01273-w), 2022-08-17
Supplement: MOESM1 [file 23374790]

## ELECTRONIC SUPPLEMENTARY MATERIAL

### Enhanced CT-based radiomics predicts pathological complete response after neoadjuvant chemotherapy for advanced adenocarcinoma of the esophagogastric junction: A two-center study

**Table S1.** AUC values and 95% confidence intervals for selected arterial radiomics features in predicting the pCR of AEG in the training and external validation groups

| Variable                                          | Training group |             | External validation group |             |
|---------------------------------------------------|----------------|-------------|---------------------------|-------------|
|                                                   | AUC values     | 95%CI       | AUC values                | 95%CI       |
| wavelet.HHL_glszm_SizeZoneNonUniformity           | 0.606          | 0.453~0.759 | 0.728                     | 0.352~1.000 |
| log.sigma.1.0.mm.3D_firstorder_RootMeanSquared    | 0.583          | 0.431~0.736 | 0.634                     | 0.382~0.886 |
| log.sigma.3.0.mm.3D_gldm_LargeDependenceEmphasis  | 0.629          | 0.486~0.772 | 0.580                     | 0.374~0.787 |
| log.sigma.5.0.mm.3D_firstorder_InterquartileRange | 0.615          | 0.472~0.758 | 0.616                     | 0.307~0.925 |
| wavelet.LLH_glcm_ClusterProminence                | 0.579          | 0.415~0.743 | 0.598                     | 0.384~0.813 |
| wavelet.LHH_glszm_GrayLevelNonUniformity          | 0.603          | 0.448~0.758 | 0.482                     | 0.166~0.799 |

Note: CI: confidential interval; pCR: pathological complete response; AEG: adenocarcinoma of the esophagogastric junction

**Table S2.** Statistical differences of the selected arterial radiomics features and Rad-score<sup>AP\_pCR</sup> between pCR and non-pCR groups in the training and external validation groups

| Training group                                    |        |                     |                     |            |         |  |
|---------------------------------------------------|--------|---------------------|---------------------|------------|---------|--|
| Variable                                          | Sample | pCR                 | Non-pCR             | Statistics | P value |  |
| wavelet.HHL_glszm_SizeZoneNonUniformity           | 60     | -0.43(-0.51, -0.11) | -0.48(-0.52, -0.37) | 1.311      | 0.190   |  |
| log.sigma.1.0.mm.3D_firstorder_RootMeanSquared    | 60     | -0.19(-0.64, 0.43)  | -0.27(-0.71, -0.18) | 1.033      | 0.302   |  |
| log.sigma.3.0.mm.3D_gldm_LargeDependenceEmphasis  | 60     | -0.14±1.09          | 0.31±0.69           | -1.915     | 0.061   |  |
| log.sigma.5.0.mm.3D_firstorder_InterquartileRange | 60     | -0.18(-0.67, 1.12)  | -0.47(-0.68, -0.09) | 1.422      | 0.155   |  |
| wavelet.LLH_glcm_ClusterProminence                | 60     | -0.35(-0.37, -0.25) | -0.37(-0.37, -0.30) | 0.977      | 0.328   |  |
| wavelet.LHH_glszm_GrayLevelNonUniformity          | 60     | -0.25(-0.75, 0.05)  | 0.01(-0.54, 0.50)   | -1.279     | 0.201   |  |
| Rad-score <sup>AP_pCR</sup>                       | 60     | 0.35(0.00, 0.66)    | 0.68(0.53, 0.76)    | -2.916     | 0.004   |  |
| External validation group                         |        |                     |                     |            |         |  |
| Variable                                          | Sample | pCR                 | Non-pCR             | Statistics | P value |  |
| wavelet.HHL_glszm_SizeZoneNonUniformity           | 32     | -0.37(-0.48, -0.16) | -0.51(-0.57, -0.17) | 1.453      | 0.146   |  |
| log.sigma.1.0.mm.3D_firstorder_RootMeanSquared    | 32     | -0.74(-1.20, 0.13)  | -1.18(-1.23, -0.68) | 0.855      | 0.393   |  |

|                                                   |    |                     |                     |        |       |
|---------------------------------------------------|----|---------------------|---------------------|--------|-------|
| log.sigma.3.0.mm.3D_gldm_LargeDependenceEmphasis  | 32 | 0.62(-0.75, 1.28)   | 0.82(0.43, 0.98)    | -0.513 | 0.608 |
| log.sigma.5.0.mm.3D_firstorder_InterquartileRange | 32 | -0.56(-0.90, 0.69)  | -0.65(-1.05, -0.41) | 0.741  | 0.459 |
| wavelet.LLH_glcm_ClusterProminence                | 32 | -0.37(-0.37, -0.34) | -0.37(-0.37, -0.35) | -0.627 | 0.531 |
| wavelet.LHH_glszm_GrayLevelNonUniformity          | 32 | -0.26(-0.65, 0.22)  | -0.10(-0.67, 0.11)  | 0.114  | 0.909 |
| Rad-score <sub>AP_pCR</sub>                       | 32 | 0.48(0.06, 0.70)    | 0.74(0.59, 0.77)    | -1.595 | 0.111 |

Note: pCR: pathological complete response; The variables without normal distribution were depicted by median (interquartile range, IQR); The variables with normal distribution were depicted by mean  $\pm$  SD; Statistically significant level:  $P < 0.05$

**Table S3.** AUC values and 95% confidence intervals for selected venous radiomics features in predicting the pCR of AEG in the training and external validation groups

| Variable                                          | Training group |             | External validation group |             |
|---------------------------------------------------|----------------|-------------|---------------------------|-------------|
|                                                   | AUC values     | 95%CI       | Variable                  | AUC values  |
| log.sigma.5.0.mm.3D_ngtdm_Complexity              | 0.674          | 0.521~0.827 | 0.643                     | 0.400~0.886 |
| wavelet.LHH_gldm_LargeDependenceEmphasis          | 0.634          | 0.480~0.788 | 0.545                     | 0.267~0.823 |
| log.sigma.3.0.mm.3D_firstorder_InterquartileRange | 0.648          | 0.499~0.797 | 0.563                     | 0.335~0.790 |
| wavelet.HHL_gldm_LargeDependenceEmphasis          | 0.588          | 0.419~0.757 | 0.679                     | 0.370~0.988 |

|                                                 |       |             |       |             |
|-------------------------------------------------|-------|-------------|-------|-------------|
| log.sigma.3.0.mm.3D_glszm_SizeZoneNonUniformity | 0.638 | 0.492~0.784 | 0.638 | 0.437~0.840 |
| log.sigma.5.0.mm.3D_firstorder_Mean             | 0.562 | 0.418~0.706 | 0.696 | 0.471~0.922 |
| log.sigma.1.0.mm.3D_glcm_ClusterProminence      | 0.640 | 0.484~0.796 | 0.741 | 0.436~1.000 |

Note: CI: confidential interval; pCR: pathological complete response; AEG: adenocarcinoma of the esophagogastric junction

**Table S4.** Statistical differences of the selected venous radiomics features and Rad-score<sup>VP\_pCR</sup> between pCR and non-pCR groups in the training and external validation groups

| Variable                                          | Training group |                    |                     | Statistics | P value |
|---------------------------------------------------|----------------|--------------------|---------------------|------------|---------|
|                                                   | Sample         | pCR                | Non-pCR             |            |         |
| log.sigma.5.0.mm.3D_ngtdm_Complexity              | 60             | -0.32(-0.70, 0.76) | -0.67(-0.83, -0.36) | 2.153      | 0.031   |
| wavelet.LHH_gldm_LargeDependenceEmphasis          | 60             | 0.38(-0.48, 0.75)  | -0.12(-1.04, 0.53)  | 1.661      | 0.097   |
| log.sigma.3.0.mm.3D_firstorder_InterquartileRange | 60             | -0.01(-0.48, 0.79) | -0.47(-1.02, 0.24)  | 1.835      | 0.066   |
| wavelet.HHL_gldm_LargeDependenceEmphasis          | 60             | 0.19(-0.21, 0.52)  | 0.55(-0.09, 0.64)   | -1.089     | 0.276   |
| log.sigma.3.0.mm.3D_glszm_SizeZoneNonUniformity   | 60             | -0.45(-0.68, 0.76) | -0.53(-0.75, -0.35) | 1.708      | 0.088   |
| log.sigma.5.0.mm.3D_firstorder_Mean               | 60             | 0.21(-0.64, 0.81)  | 0.47(-0.14, 0.65)   | -0.771     | 0.441   |

| log.sigma.1.0.mm.3D_glcm_ClusterProminence        | 60     | -0.46(-0.54, 0.07)  | -0.54(-0.55, -0.32) | 1.732      | 0.083   |
|---------------------------------------------------|--------|---------------------|---------------------|------------|---------|
| Rad-score <sup>VP</sup> _pCR                      | 60     | 0.60(0.00, 0.82)    | 0.87(0.62, 0.93)    | -3.107     | 0.002   |
| External validation group                         |        |                     |                     |            |         |
| Variable                                          | Sample | pCR                 | Non-pCR             | Statistics | P value |
| log.sigma.5.0.mm.3D_ngtdm_Complexity              | 32     | -0.59(-0.82, 0.40)  | -0.80(-0.84, -0.45) | 0.912      | 0.362   |
| wavelet.LHH_gldm_LargeDependenceEmphasis          | 32     | -0.44±0.73          | -0.63±0.59          | 0.489      | 0.628   |
| log.sigma.3.0.mm.3D_firstorder_InterquartileRange | 32     | -0.66(-1.15, 0.04)  | -0.96(-1.04, -0.54) | 0.399      | 0.690   |
| wavelet.HHL_gldm_LargeDependenceEmphasis          | 32     | -0.19(-0.53, 0.04)  | -0.41(-0.92, -0.13) | 1.140      | 0.254   |
| log.sigma.3.0.mm.3D_glszm_SizeZoneNonUniformity   | 32     | -0.64(-0.75, -0.12) | -0.41(-0.62, -0.19) | -0.883     | 0.377   |
| log.sigma.5.0.mm.3D_firstorder_Mean               | 32     | -0.02±1.11          | 0.71±0.56           | -2.076     | 0.077   |
| log.sigma.1.0.mm.3D_glcm_ClusterProminence        | 32     | -0.55(-0.56, -0.41) | -0.57(-0.57, -0.53) | 1.538      | 0.124   |
| Rad-score_VP_pCR                                  | 32     | 0.70(0.16, 0.88)    | 0.92(0.65, 0.94)    | -1.709     | 0.087   |

Note: pCR: pathological complete response; The variables without normal distribution were depicted by median (interquartile range, IQR); The variables with normal distribution were depicted by mean ± SD; Statistically significant level:  $P < 0.05$

**Table S5.** The results of univariate logistic regression analysis of clinical characteristics in predicting pCR of AEG patients

| Variable | B | Wald | Odds ratio | 95% CI | P value |
|----------|---|------|------------|--------|---------|
|----------|---|------|------------|--------|---------|

|                                 |         |       |       |                           |       |
|---------------------------------|---------|-------|-------|---------------------------|-------|
| Gender                          | -18.109 | 0     | 0     | NA~9.303x10 <sup>54</sup> | 0.993 |
| Age                             | -0.583  | 0.910 | 0.558 | 0.156~1.778               | 0.340 |
| T-staging before NAC            | -0.884  | 2.391 | 0.413 | 0.129~1.242               | 0.122 |
| N-staging before NAC            | -0.327  | 0.309 | 0.721 | 0.216~2.232               | 0.578 |
| Borrmann typing                 | -1.667  | 6.658 | 0.189 | 0.047~0.624               | 0.010 |
| CEA                             | -1.124  | 2.522 | 0.325 | 0.068~1.179               | 0.112 |
| CA199                           | 0.903   | 1.373 | 2.467 | 0.523~11.718              | 0.241 |
| CA125                           | -1.088  | 1.076 | 0.337 | 0.018~1.757               | 0.300 |
| Serum albumin                   | 0.564   | 1.008 | 1.757 | 0.589~5.427               | 0.315 |
| Tumor thickness                 | 1.275   | 4.386 | 3.578 | 1.137~12.812              | 0.036 |
| Degree of tumor differentiation | 0.975   | 2.932 | 2.652 | 0.879~8.361               | 0.087 |

Note: B logistic regression coefficient; CI confidence interval; Statistically significant level:  $P < 0.05$

**Table S6.** The results of Delong test for AUC values of all models

| Models                                                     | Training group |         | External validation group |         |
|------------------------------------------------------------|----------------|---------|---------------------------|---------|
|                                                            | Z              | P value | Z                         | P value |
| Arterial model.vs. Venous model                            | -0.180         | 0.857   | -0.088                    | 0.930   |
| Arterial model.vs. Clinical model                          | -0.175         | 0.861   | -0.668                    | 0.504   |
| Arterial model.vs. Arterial-Venous combined model          | -0.694         | 0.488   | -0.418                    | 0.676   |
| Arterial model.vs. Arterial-Clinical combined model        | -1.481         | 0.139   | -1.294                    | 0.196   |
| Arterial model.vs. Venous-Clinical combined model          | -0.959         | 0.338   | -1.037                    | 0.300   |
| Arterial model.vs. Arterial-Venous-Clinical combined model | -1.657         | 0.097   | -1.300                    | 0.193   |
| Venous model.vs. Clinical model                            | -0.019         | 0.985   | -0.517                    | 0.605   |
| Venous model.vs. Arterial-Venous combined model            | -0.303         | 0.762   | -0.202                    | 0.840   |
| Venous model.vs. Arterial-Clinical combined model          | -0.964         | 0.335   | -0.797                    | 0.426   |
| venous model.vs.Venous-Clinical combined model             | -0.955         | 0.340   | -0.981                    | 0.327   |
| venous model.vs. Arterial-Venous-Clinical combined model   | -1.305         | 0.192   | -0.925                    | 0.355   |
| Clinical model.vs. Arterial-Venous combined model          | -0.150         | 0.881   | 0.347                     | 0.729   |
| Clinical model.vs. Arterial-Clinical combined model        | -1.957         | 0.050   | -0.963                    | 0.336   |

|                                                                              |        |       |        |       |
|------------------------------------------------------------------------------|--------|-------|--------|-------|
| Clinical model.vs. Venous-Clinical combined model                            | -1.593 | 0.111 | -0.561 | 0.575 |
| Clinical model.vs. Arterial-Venous-Clinical combined model                   | -1.436 | 0.151 | -1.093 | 0.275 |
| Arterial-Venous combined model.vs. Arterial-Clinical combined model          | -0.965 | 0.335 | -0.771 | 0.441 |
| Arterial-Venous combined model.vs. Venous-Clinical combined model            | -0.680 | 0.496 | -0.819 | 0.413 |
| Arterial-Venous combined model.vs. Arterial-Venous-Clinical combined model   | -1.348 | 0.178 | -0.897 | 0.370 |
| Arterial-Clinical combined model.vs. Venous-Clinical combined model          | 0.450  | 0.652 | 0.169  | 0.866 |
| Arterial-Clinical combined model.vs. Arterial-Venous-Clinical combined model | -0.084 | 0.933 | -0.337 | 0.736 |
| Venous-Clinical combined model.vs. Arterial-Venous-Clinical combined model   | -0.593 | 0.553 | -0.500 | 0.617 |

**Table S7.** The results of the Hosmer-Lemeshow test for different models in the training and external validation groups

| Model          | Training group |                | External validation group |            |
|----------------|----------------|----------------|---------------------------|------------|
|                | Statistics     | <i>P</i> value | Models                    | Statistics |
| Arterial model | 4.997          | 0.758          | 7.949                     | 0.438      |



|                                         |        |       |        |       |
|-----------------------------------------|--------|-------|--------|-------|
| Venous model                            | 8.427  | 0.393 | 8.467  | 0.389 |
| Clinical model                          | 0.732  | 0.392 | 1.189  | 0.276 |
| Arterial-Venous combined model          | 12.152 | 0.145 | 5.326  | 0.722 |
| Arterial-Clinical combined model        | 6.900  | 0.547 | 1.831  | 0.986 |
| Venous-Clinical combined model          | 11.885 | 0.156 | 2.038  | 0.980 |
| Arterial-Venous-Clinical combined model | 14.879 | 0.062 | 10.478 | 0.233 |

Note:  $P > 0.05$ : no significant difference between the predicted and actual value.

**Table S8.** Performance of arterial models based on other classifiers in the training and external validation groups

|                | Model                   | AUC   | 95%CI       | Threshold | Specificity | Sensitivity | Accuracy | NPV   | PPV   |
|----------------|-------------------------|-------|-------------|-----------|-------------|-------------|----------|-------|-------|
| Training group | Naïve Bayes             | 0.736 | 0.607~0.865 | 0.510     | 0.610       | 0.789       | 0.667    | 0.862 | 0.484 |
|                | Logistic regression     | 0.720 | 0.592~0.848 | 0.341     | 0.634       | 0.789       | 0.683    | 0.867 | 0.500 |
|                | Support vector machines | 0.707 | 0.564~0.850 | 1.000     | 0.732       | 0.632       | 0.700    | 0.811 | 0.522 |
|                | Decision tree           | 0.856 | 0.768~0.945 | 0.588     | 0.756       | 0.895       | 0.800    | 0.939 | 0.630 |
|                | AdaBoost                | 1.000 | 1.000~1.000 | 0.493     | 1.000       | 1.000       | 1.000    | 1.000 | 1.000 |

|                                 |                         |       |             |       |       |       |       |       |       |
|---------------------------------|-------------------------|-------|-------------|-------|-------|-------|-------|-------|-------|
| External<br>validation<br>group | Naïve Bayes             | 0.750 | 0.535~0.965 | 0.510 | 0.536 | 0.750 | 0.563 | 0.938 | 0.188 |
|                                 | Logistic regression     | 0.679 | 0.417~0.940 | 0.341 | 0.536 | 0.750 | 0.563 | 0.938 | 0.188 |
|                                 | Support vector machines | 0.554 | 0.315~0.792 | 1.000 | 0.643 | 0.250 | 0.594 | 0.857 | 0.091 |
|                                 | Decision tree           | 0.652 | 0.426~0.870 | 0.588 | 0.500 | 0.750 | 0.531 | 0.933 | 0.176 |
|                                 | AdaBoost                | 0.607 | 0.372~0.842 | 0.493 | 0.821 | 0.250 | 0.750 | 0.885 | 0.167 |

**Table S9.** Performance of venous models based on other classifiers in the training and external validation groups

|                   | Model                   | AUC   | 95%CI       | Threshold | Specificity | Sensitivity | Accuracy | NPV   | PPV   |
|-------------------|-------------------------|-------|-------------|-----------|-------------|-------------|----------|-------|-------|
| Training<br>group | Naïve Bayes             | 0.751 | 0.614~0.888 | 0.856     | 0.829       | 0.632       | 0.767    | 0.829 | 0.632 |
|                   | Logistic regression     | 0.728 | 0.581~0.875 | 0.396     | 0.854       | 0.579       | 0.767    | 0.814 | 0.647 |
|                   | Support vector machines | 1.000 | 1.000~1.000 | 0.042     | 1.000       | 1.000       | 1.000    | 1.000 | 1.000 |
|                   | Decision tree           | 0.367 | 0.254~0.479 | /         | 0           | 1.000       | 0.317    | /     | 0.317 |
|                   | AdaBoost                | 1.000 | 1.000~1.000 | 0.493     | 1.000       | 1.000       | 1.000    | 1.000 | 1.000 |

|                                 |                         |       |             |       |       |       |       |       |       |
|---------------------------------|-------------------------|-------|-------------|-------|-------|-------|-------|-------|-------|
| External<br>validation<br>group | Naïve Bayes             | 0.768 | 0.489~1.000 | 0.856 | 0.750 | 0.750 | 0.750 | 0.955 | 0.300 |
|                                 | Logistic regression     | 0.491 | 0.212~0.770 | 0.396 | 0.429 | 0.500 | 0.438 | 0.857 | 0.111 |
|                                 | Support vector machines | 0.527 | 0.179~0.874 | 0.042 | 0     | 1.000 | 0.125 | /     | 0.125 |
|                                 | Decision tree           | 0.589 | 0.293~0.886 | /     | 1.000 | 0     | 0.875 | 0.875 | /     |
|                                 | AdaBoost                | 0.759 | 0.414~1.000 | 0.493 | 0.821 | 0.750 | 0.813 | 0.958 | 0.375 |

**Table S10.** Performance of clinical models based on other classifiers in the training and external validation groups

|                   | Model                   | AUC   | 95%CI       | Threshold | Specificity | Sensitivity | Accuracy | NPV   | PPV   |
|-------------------|-------------------------|-------|-------------|-----------|-------------|-------------|----------|-------|-------|
| Training<br>group | Naïve Bayes             | 0.753 | 0.622~0.884 | 0.351     | 0.683       | 0.789       | 0.717    | 0.875 | 0.536 |
|                   | Logistic regression     | 0.753 | 0.622~0.884 | 0.364     | 0.683       | 0.789       | 0.717    | 0.875 | 0.536 |
|                   | Support vector machines | 0.750 | 0.619~0.881 | 0.999     | 0.756       | 0.684       | 0.733    | 0.838 | 0.565 |
|                   | Decision tree           | 0.733 | 0.603~0.863 | 0.606     | 0.756       | 0.684       | 0.733    | 0.838 | 0.565 |
|                   | AdaBoost                | 0.791 | 0.680~0.903 | 0.340     | 0.610       | 0.895       | 0.700    | 0.926 | 0.515 |

|                                 |                         |       |             |       |       |       |       |       |       |
|---------------------------------|-------------------------|-------|-------------|-------|-------|-------|-------|-------|-------|
| External<br>validation<br>group | Naïve Bayes             | 0.848 | 0.710~0.987 | 0.351 | 0.857 | 0.750 | 0.844 | 0.960 | 0.429 |
|                                 | Logistic regression     | 0.848 | 0.710~0.987 | 0.364 | 0.857 | 0.750 | 0.844 | 0.960 | 0.429 |
|                                 | Support vector machines | 0.304 | 0.187~0.420 | 0.999 | 0.071 | 1.000 | 0.188 | 1.000 | 0.133 |
|                                 | Decision tree           | 0.723 | 0.473~0.973 | 0.606 | 0.929 | 0     | 0.813 | 0.867 | 0     |
|                                 | AdaBoost                | 0.670 | 0.490~0.849 | 0.340 | 0.679 | 0.750 | 0.688 | 0.950 | 0.250 |

---

Figure:

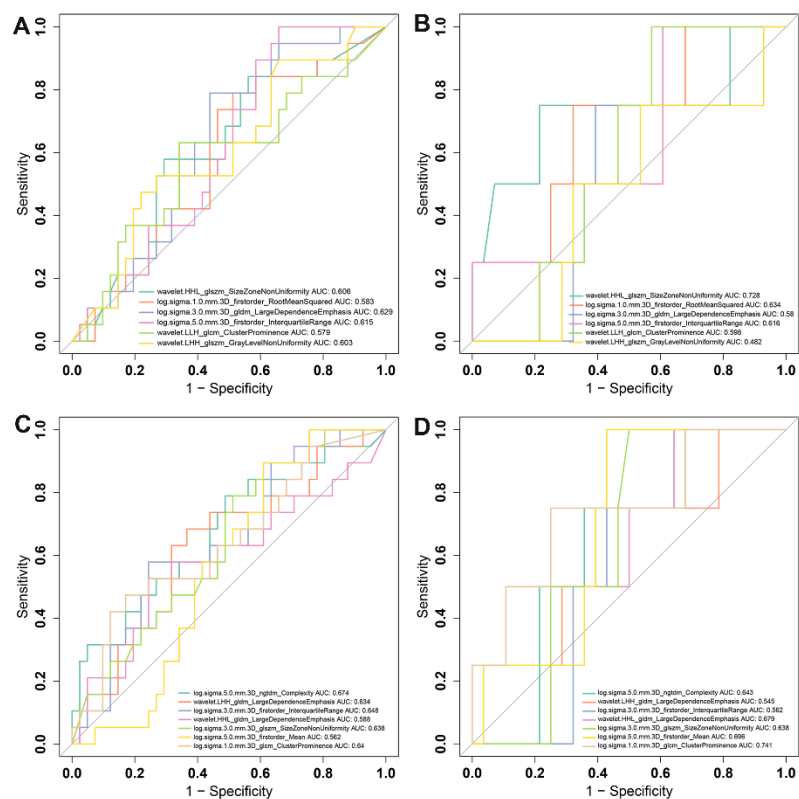

**Fig.S1** ROC curves of individual features in different models to predict pathological complete response (pCR). 1A: ROC curves of individual features of arterial model predicting pCR in the training group; 1B: ROC curves of individual features of arterial model predicting pCR in the external validation group; 1C: ROC curves of individual features of venous model predicting pCR in the training group; 1D: ROC curves of individual features of venous model predicting pCR in the external validation group.
